# Supplementary material for: Charge State Effects in Swift-Heavy-Ion-Irradiated Nanomaterials
Source: MDPI journal article supplement (doi:10.3390/cryst12060865), 2022-06-19
Supplement: s1 [file s1]

## Supplemental material

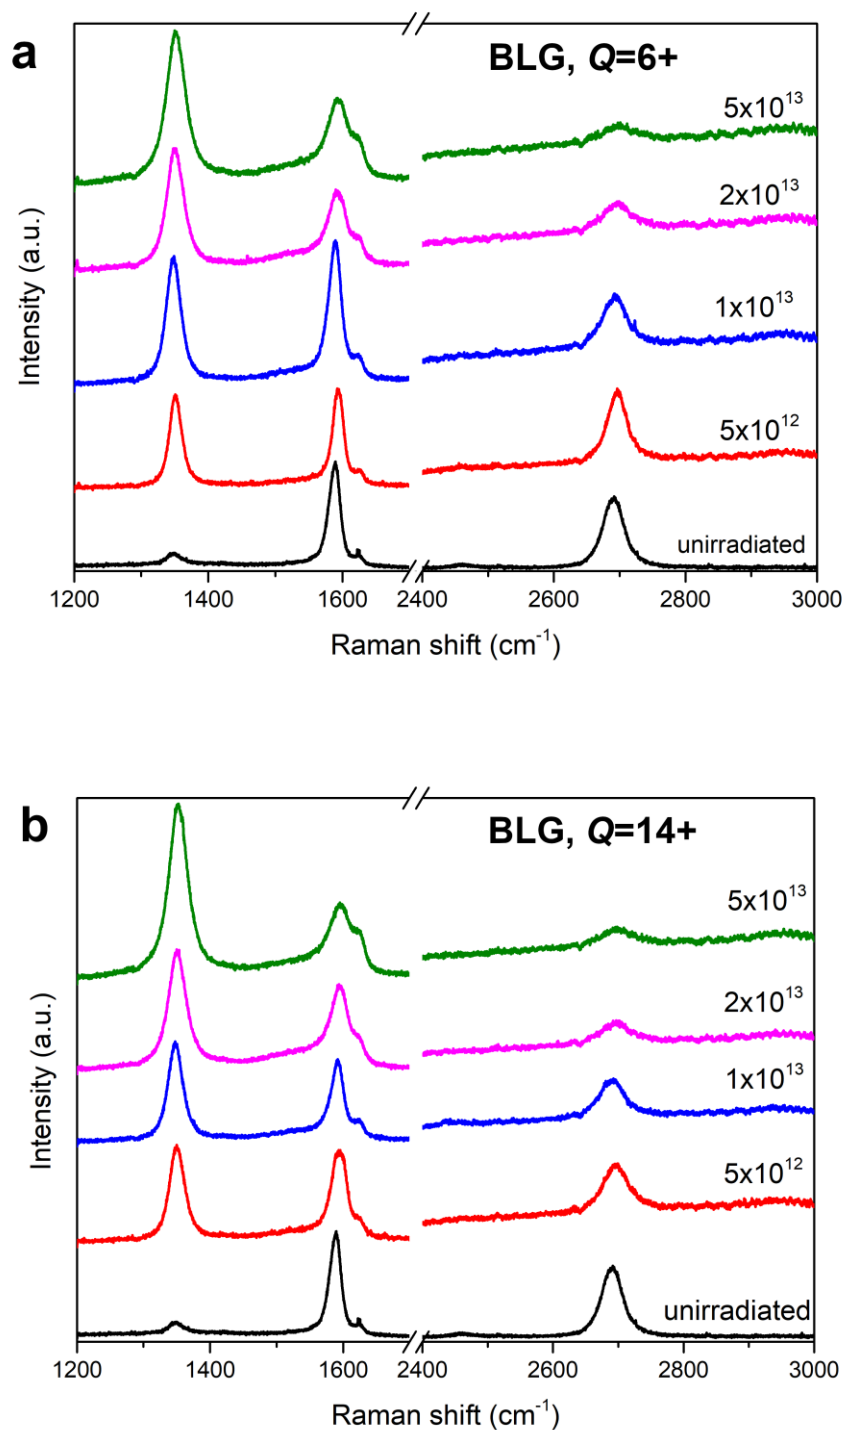

**Figure S1.** Raman spectra of bilayer graphene (BLG) irradiated with 23 MeV I using (a) charge state  $Q=6+$ , (b) equilibrium charge state  $Q=14+$ .

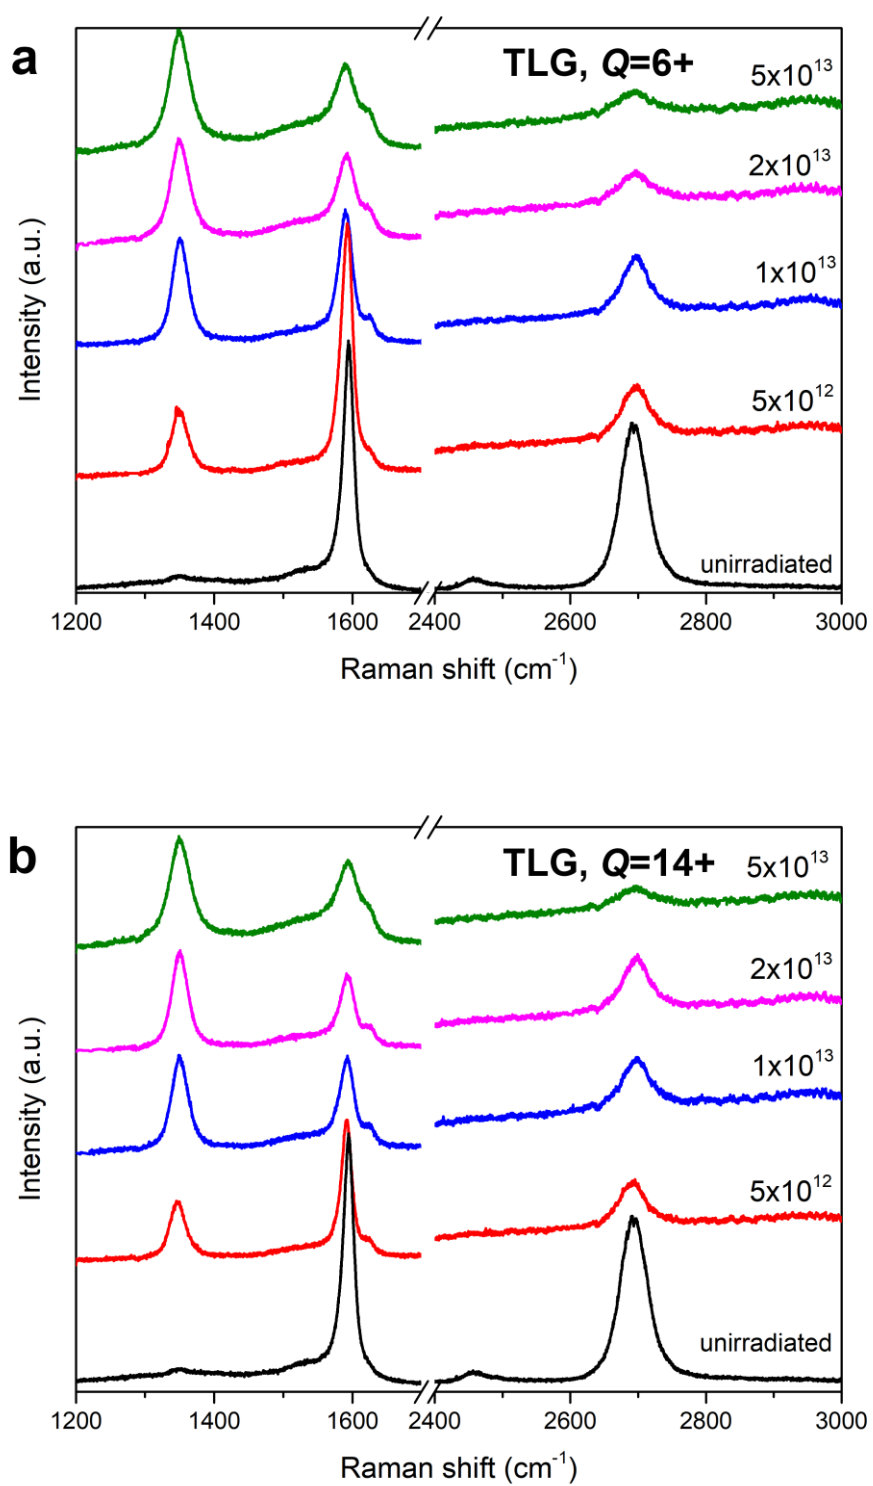

**Figure S2.** Raman spectra of trilayer graphene (TLG) irradiated with 23 MeV I using (a) charge state  $Q=6+$ , (b) equilibrium charge state  $Q=14+$ .

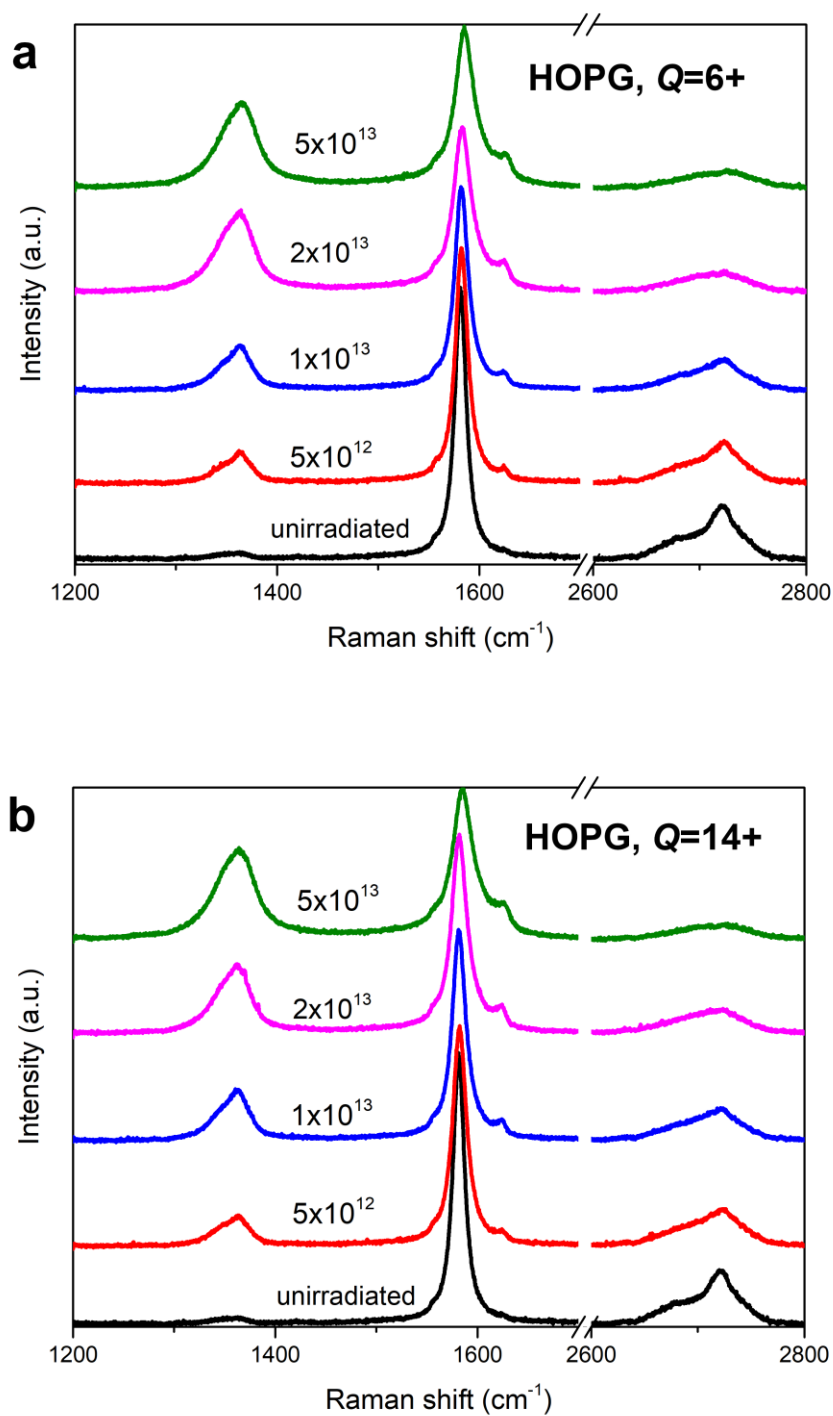

**Figure S3.** Raman spectra of graphite (HOPG) irradiated with 23 MeV I using (a) charge state  $Q=6+$  (reprinted with permission from ref. [27]), (b) equilibrium charge state  $Q=14+$ .
